# Supplementary material
Source: publisher site journal article supplement (https://neobiota.pensoft.net/article/31619/download/suppl/32/)
Supplement: Supplementary file 1

## Supplementary File 2 - Articles included in the analysis

| authors                                                                                       | title                                                                                                                                                                             | year |
|-----------------------------------------------------------------------------------------------|-----------------------------------------------------------------------------------------------------------------------------------------------------------------------------------|------|
| Abramides, G.C., Roiz, D., Guitart, R., Quintana, S., Giménez, N.                             | Control of the asian tiger mosquito ( <i>aedes albopictus</i> ) in a firmly established area in spain: Risk factors and people's involvement                                      | 2013 |
| Andreu, J., Vilà, M., Hulme, P.E.                                                             | An assessment of stakeholder perceptions and management of noxious alien plants inSpain                                                                                           | 2009 |
| Bardsley, D., Edwards-Jones, G.                                                               | Stakeholders' perceptions of the impacts of invasive exotic plant species in the Mediterranean region                                                                             | 2006 |
| Bardsley, D.K., Edwards-Jones, G.                                                             | Invasive species policy and climate change: social perceptions of environmental change in the Mediterranean                                                                       | 2007 |
| Beardmore, B.                                                                                 | Boater perceptions of environmental issues affecting lakes in Northern Wisconsin                                                                                                  | 2015 |
| Bhattacharyya, J., Larson, B.M.H.                                                             | The need for indigenous voices in discourse about introduced species: Insights from a controversy over wild horses                                                                | 2014 |
| Binimelis, R., Monterroso, I., Rodríguez-Labajos, B.                                          | A social analysis of the bioinvasions of <i>Dreissena polymorpha</i> in Spain and <i>Hydrilla verticillata</i> in Guatemala                                                       | 2007 |
| Bremner, A., Park, K.                                                                         | Public Attitudes to the Management of Invasive Non-Native Species in Scotland                                                                                                     | 2007 |
| Brook, R.K., Van Beest, F.M.                                                                  | Feral wild boar distribution and perceptions of risk on the central Canadian prairies                                                                                             | 2014 |
| Burt, J.W., Muir, A.A., Piovato, J., Veblen, K.E., Chang, A.L., Grossman, J.D., Weiskel, H.W. | Preventing horticultural introductions of invasive plants: Potential efficacy of voluntary initiatives                                                                            | 2007 |
| Carballo-Cárdenas, E. C.                                                                      | Controversies and consensus on the lionfish invasion in the western atlantic ocean                                                                                                | 2015 |
| Carrier, S.D., Bruland, G.L., Cox, L.J., Lepczyk, C.A.                                        | The perceptions of coastal resource managers in Hawai'i: The current situation and outlook for the future                                                                         | 2012 |
| Cottet, M., Piola, F., Le Lay, Y.-F., Rouifed, S., Rivière-Honegger, A.                       | How environmental managers perceive and approach the issue of invasive species: the case of Japanese knotweed s.l. (Rhône River, France)                                          | 2015 |
| Dalrymple, K.E., Shaw, B.R., Brossard, D.                                                     | Following the Leader: Using Opinion Leaders in Environmental Strategic Communication                                                                                              | 2013 |
| Dampier, J.E.E., Harper, R.W., Schwartzberg, L., Lemelin, R.H.                                | A comparison of arborists' and horticulturists' preferences of <i>Tsuga chinensis</i> to <i>T. canadensis</i> in the urban landscape                                              | 2015 |
| Daume, S.                                                                                     | Mining Twitter to monitor invasive alien species - An analytical framework and sample information topologies                                                                      | 2016 |
| De Neergaard, A., Saarnak, C., Hill, T., Khanyile, M., Berzosa, A.M., Birch-Thomsen, T.       | Australian wattle species in the Drakensberg region of South Africa - An invasive alien or a natural resource?                                                                    | 2005 |
| Deines, A. M.; Wittmann, M. E.; Deines, J. M.; Lodge, D.                                      | Tradeoffs among Ecosystem Services Associated with Global Tilapia Introductions                                                                                                   | 2016 |
| Dhanya, B., Sathish, B.N., Viswanath, S., Purushothaman, S.                                   | Ecosystem services of native trees: Experiences from two traditional agroforestry systems in Karnataka, Southern India                                                            | 2014 |
| Drake, D.A.R., Mercader, R., Dobson, T., Mandrak, N.E.                                        | Can we predict risky human behaviour involving invasive species? A case study of the release of fishes to the wild                                                                | 2014 |
| Eiswerth, M.E., Yen, S.T., van Kooten, G.C.                                                   | Factors determining awareness and knowledge of aquatic invasive species                                                                                                           | 2011 |
| Eskridge, A.E., Alderman, D.H.                                                                | Alien invaders, plant thugs, and the southern curse framing kudzu as environmental other through discourses of fear                                                               | 2010 |
| Falk-Petersen, J.                                                                             | Alien invasive species management: Stakeholder perceptions of the barents sea king crab                                                                                           | 2014 |
| Fischer, A., Selge, S., Van Der Wal, R., Larson, B.M.H.                                       | The public and professionals reason similarly about the management of non-native invasive species: A quantitative investigation of the relationship between beliefs and attitudes | 2014 |
| Fischer, A.P., Charnley, S.                                                                   | Private forest owners and invasive plants: Risk perception and management                                                                                                         | 2012 |

|                                                                                                                                                                                                                                                                                                               |                                                                                                                                                                 |      |
|---------------------------------------------------------------------------------------------------------------------------------------------------------------------------------------------------------------------------------------------------------------------------------------------------------------|-----------------------------------------------------------------------------------------------------------------------------------------------------------------|------|
| Fisher, N.I., Lee, A.J., Cribb, J.H.J., Haynes, G.D.                                                                                                                                                                                                                                                          | Public perceptions of foxes and fox eradication in Tasmania                                                                                                     | 2011 |
| Friedel, M.H., Grice, A.C., Marshall, N.A., van Klinken, R.D.                                                                                                                                                                                                                                                 | Reducing contention amongst organisations dealing with commercially valuable but invasive plants: The case of buffel grass                                      | 2011 |
| García-Llorente, M., Martín-López, B., González, J.A., Alcorlo, P., Montes, C.                                                                                                                                                                                                                                | Social perceptions of the impacts and benefits of invasive alien species: Implications for management                                                           | 2008 |
| García-Llorente, M., Martín-López, B., Nunes, P.A.L.D., González, J.A., Alcorlo, P., Montes, C.                                                                                                                                                                                                               | Analyzing the social factors that influence willingness to pay for invasive alien species management under two different strategies: Eradication and prevention | 2011 |
| Gozlan, R.E., Burnard, D., Andreou, D., Britton, J.R.                                                                                                                                                                                                                                                         | Understanding the Threats Posed by Non-Native Species: Public vs. Conservation Managers                                                                         | 2013 |
| Haab, T. C.; Whitehead, J. C.; Parsons, G. R.; Price, J.                                                                                                                                                                                                                                                      | Effects of information about invasive species on risk perception and seafood demand by gender and race                                                          | 2010 |
| Hart, P.S., Larson, B.M.H.                                                                                                                                                                                                                                                                                    | Communicating About Invasive Species: How "Driver" and "Passenger" Models Influence Public Willingness to Take Action                                           | 2014 |
| Hertling, U.M., Lubke, R.A.                                                                                                                                                                                                                                                                                   | Use of <i>Ammophila arenaria</i> for dune stabilization in South Africa and its current distribution - Perceptions and problems                                 | 1999 |
| Howell, A. P.; Shaw, B. R.; Alvarez, G.                                                                                                                                                                                                                                                                       | Bait Shop Owners as Opinion Leaders: A Test of the Theory of Planned Behavior to Predict Pro-Environmental Outreach Behaviors and Intentions                    | 2015 |
| Humair, F., Kueffer, C., Siegrist, M.                                                                                                                                                                                                                                                                         | Are non-native plants perceived to be more risky? Factors influencing horticulturists' risk perceptions of ornamental plant species                             | 2014 |
| Jay, M., Stolte, O.                                                                                                                                                                                                                                                                                           | A human ecology of urban ravine restoration: A New Zealand example                                                                                              | 2011 |
| Johnson, D.D., Davies, K.W., Schreder, P.T., Chamberlain, A.-M.                                                                                                                                                                                                                                               | Perceptions of ranchers about medusahead ( <i>Taeniatherum caput-medusae</i> (L.) Nevski) management on sagebrush steppe rangelands                             | 2011 |
| Kelley, W.K., Fernandez-Gimenez, M.E., Brown, C.S.                                                                                                                                                                                                                                                            | Managing downy brome ( <i>Bromus tectorum</i> ) in the Central Rockies: Land manager perspectives                                                               | 2013 |
| Kloskowski, J.                                                                                                                                                                                                                                                                                                | Human-wildlife conflicts at pond fisheries in eastern Poland: Perceptions and management of wildlife damage                                                     | 2011 |
| Kosaka, Y., Saikia, B., Mingki, T., Tag, H., Riba, T., Ando, K.                                                                                                                                                                                                                                               | Roadside distribution patterns of invasive alien plants along an altitudinal gradient in Arunachal Himalaya, India                                              | 2010 |
| Kull, C.A., Shackleton, C.M., Cunningham, P.J., Ducatillon, C., Dufour-Dror, J.-M., Esler, K.J., Friday, J.B., Gouveia, A.C., Griffin, A.R., Marchante, E., Midgley, S.J., Pauchard, A., Rangan, H., Richardson, D.M., Rinaudo, T., Tassin, J., Urgenson, L.S., von Maltitz, G.P., Zenni, R.D., Zylstra, M.J. | Adoption, use and perception of Australian acacias around the world                                                                                             | 2011 |
| Kumar, A., Sinha, A.K., Singh, D.                                                                                                                                                                                                                                                                             | Studies of Eucalyptus plantations under the farm forestry and agroforestry systems of U.P. in Northern India                                                    | 2003 |
| Lima, F.P., Latini, A.O., De Marco Jr., P.                                                                                                                                                                                                                                                                    | How are the lakes? Environmental perception by fishermen and alien fish dispersal in Brazilian tropical lakes                                                   | 2010 |
| Limburg, K.E., Luzadis, V.A., Ramsey, M., Schulz, K.L., Mayer, C.M.                                                                                                                                                                                                                                           | The good, the bad, and the algae: Perceiving ecosystem services and disservices generated by zebra and quagga mussels                                           | 2010 |
| Lohr, C.A., Lepczyk, C.A., Johnson, E.D.                                                                                                                                                                                                                                                                      | The Islands Are Different: Human Perceptions of Game Species in Hawaii                                                                                          | 2014 |
| Mackenzie, F.B., Larson, M.H.B.                                                                                                                                                                                                                                                                               | Participation under time constraints: Landowner perceptions of rapid response to the emerald ash borer                                                          | 2010 |
| Marshall, N.A., Friedel, M., van Klinken, R.D., Grice, A.C.                                                                                                                                                                                                                                                   | Considering the social dimension of invasive species: The case of buffel grass                                                                                  | 2011 |

|                                                                                     |                                                                                                                                                                            |      |
|-------------------------------------------------------------------------------------|----------------------------------------------------------------------------------------------------------------------------------------------------------------------------|------|
| Maundu, P., Kibet, S., Morimoto, Y., Imbumi, M., Adeka, R.                          | Impact of <i>Prosopis juliflora</i> on Kenya's semi-arid and arid ecosystems and local livelihoods                                                                         | 2009 |
| Mekonnen, Z., Kassa, H., Lemenh, M., Campbell, B.                                   | The role and management of Eucalyptus in Lode Hetosa District, Central Ethiopia                                                                                            | 2007 |
| Morton, L.W., Regen, E., Engle, D.M., Miller, J.R., Harr, R.N.                      | Perceptions of landowners concerning conservation, grazing, fire, and Eastern Redcedar management in tallgrass prairie                                                     | 2010 |
| Nang'alelwa, M.                                                                     | Public awareness activities on <i>Eichhornia crassipes</i> in the Victoria Falls World Heritage Site, Livingstone, Zambia                                                  | 2008 |
| Norgaard, K.M.                                                                      | The politics of invasive weed management: Gender, race, and risk perception in rural California                                                                            | 2007 |
| Notzke, C.                                                                          | An exploration into political ecology and nonhuman agency: The case of the wild horse in western Canada                                                                    | 2013 |
| Nyeko, P., Mutitu, E., Day, R.                                                      | Farmers knowledge, perceptions and management of the gall-forming wasp, <i>Leptocybe invasa</i> (Hymenoptera: Eulophidae), on Eucalyptus species in Uganda                 | 2007 |
| Olszańska, Agnieszka; Solarz, Wojciech; Najberek, Kamil                             | To kill or not to kill—Practitioners' opinions on invasive alien species management as a step towards enhancing control of biological invasions                            | 2016 |
| Otieno, C., Spada, H., Liebler, K., Ludemann, T., Deil, U., Renkl, A.               | Informing about climate change and invasive species: how the presentation of information affects perception of risk, emotions, and learning                                | 2014 |
| Otieno, C., Spada, H., Renkl, A.                                                    | Effects of news frames on perceived risk, emotions, and learning                                                                                                           | 2013 |
| Preston, G.R., Seigfried, W.R.                                                      | The protection of biological diversity in South Africa: profiles and perceptions of professional practitioners in nature conservation agencies and natural history museums | 1995 |
| Rai, R.K., Scarborough, H., Subedi, N., Lamichhane, B.                              | Invasive plants - Do they devastate or diversify rural livelihoods? Rural farmers' perception of three invasive plants in Nepal                                            | 2012 |
| Rijal, S., Cochard, R.                                                              | Invasion of <i>Mimosa pigra</i> on the cultivated Mekong River floodplains near Kratie, Cambodia: farmers' coping strategies, perceptions, and outlooks                    | 2015 |
| Sakurai, R., Jacobson, S.K., Ueda, G.                                               | Public Perceptions of Significant Wildlife in Hyogo, Japan                                                                                                                 | 2014 |
| Schreck Reis, C., Marchante, H., Freitas, H., Marchante, E.                         | Public Perception of Invasive Plant Species: Assessing the impact of workshop activities to promote young students' awareness                                              | 2013 |
| Schüttler, E., Rozzi, R., Jax, K.                                                   | Towards a societal discourse on invasive species management: A case study of public perceptions of mink and beavers in Cape Horn                                           | 2011 |
| Selge, S., Fischer, A.                                                              | How people familiarize themselves with complex ecological concepts-anchoring of social representations of invasive non-native species                                      | 2011 |
| Shackleton, C.M., Gambiza, J.                                                       | Social and ecological trade offs in combating land degradation: The case of invasion by a woody shrub ( <i>Euryops floribundus</i> ) at Macubeni, South Africa             | 2008 |
| Shackleton, R.T., Le Maitre, D.C., Richardson, D.M.                                 | Stakeholder perceptions and practices regarding <i>Prosopis</i> (mesquite) invasions and management in South Africa                                                        | 2015 |
| Shackleton, S., Kirby, D., Gambiza, J.                                              | Invasive plants - friends or foes? contribution of prickly pear ( <i>Opuntia ficus-indica</i> ) to livelihoods in Makana Municipality, Eastern Cape, South Africa          | 2011 |
| Sheil, D., Padmanaba, M.                                                            | Innocent invaders? A preliminary assessment of <i>Cecropia</i> , an American tree, in Java                                                                                 | 2011 |
| Tannent, J.K., Downs, C.T., Wald, D.M., Watson, H.K.                                | Public perceptions of feral cats within an urban conservancy on a campus of the University of KwaZulu-Natal                                                                | 2010 |
| Terefe, B., Limenih, M., Gure, A., Angassa, A.                                      | Impact of <i>Acacia drepanolobium</i> (an invasive woody species) on Gum-resin resources and local livelihood in Borana, southern Ethiopia                                 | 2011 |
| Urgenson, L.S., Prozesky, H.E., Esler, K.J.                                         | Stakeholder perceptions of an ecosystem services approach to clearing invasive alien plants on private land                                                                | 2013 |
| Vaarzon-Morel, P., Edwards, G.                                                      | Incorporating aboriginal people's perceptions of introduced animals in resource management: Insights from the feral camel project                                          | 2012 |
| Vanderhoeven, S., Piqueray, J., Halford, M., Nulens, G., Vincke, J., Mahy, G.       | Perception and understanding of invasive alien species issues by nature conservation and horticulture professionals in Belgium                                             | 2011 |
| Verbrugge, L.N.H., Van Den Born, R.J.G., Lenders, H.J.R.                            | Exploring public perception of non-native species from a visions of nature perspective                                                                                     | 2013 |
| Verbrugge, L.N.H., van den Born, R.J.G., Leuven, R.S.E.W., van Valkenburg, J.L.C.H. | Evaluating stakeholder awareness and involvement in risk prevention of aquatic invasive plant species by a national code of conduct                                        | 2014 |

|                                                     |                                                                                                                                  |      |
|-----------------------------------------------------|----------------------------------------------------------------------------------------------------------------------------------|------|
| Wanderer, E.M.                                      | Biologies of betrayal: Judas goats and sacrificial mice on the margins of Mexico                                                 | 2015 |
| Wilen, C.A., Bell, C.E., Grieshop, J.I., Robb, K.L. | Survey of university of California academics' attitudes regarding the impact of escaped horticultural introductions on wildlands | 2006 |

---
